# Supplementary material for: Mechanical regulation of cardiac fibroblast profibrotic phenotypes
Source: PubMed Central journal article supplement — Mol Biol Cell. 2017 Jul 7;28(14):1871–82. doi: 10.1091/mbc.E17-01-0014 (PMC5541838; doi:10.1091/mbc.e17-01-0014), 2017-07-07
Supplement: supp_E17-01-0014v1_CombinedSupMats.pdf [file supp_E17-01-0014v1_CombinedSupMats.pdf]

# Supplemental Materials

*Molecular Biology of the Cell*

Herum et al.

## Supplementary Figure Legends

Supplementary Figure 1. (A) Smooth muscle  $\alpha$ -actin (SMA) staining (bright nuclei in CFB on PA gels are nuclear staining of EdU from the proliferation assay). (B) Proliferation of cardiac fibroblasts (CFB) cultured on HA and PA gels with stiffness of 3kPa and 8kPa. (C) Confocal cross-section micrographs and quantification of collagen staining intensity on methacrylated hyaluronic acid (HA) gels and PA gels. Student's *t*-test showed no significant difference for proliferation and collagen coating between HA and PA gels.

Supplementary Figure 2. Paracrine signaling model. (A) Proliferation rate of cardiac fibroblast (CFB) cultures alone, or in co-culture with non-stretched cardiomyocytes (CM) or stretched CM. CFB were plated on PA gels with 3kPa stiffness. Two-way ANOVA showed significant effect of culture type\*\*\* and Tukey's post hoc test as indicated in figures. N=3-6. (B) Tissue inhibitor of metalloproteinase 1 (TIMP1), chemokine (C-X-C motif) ligand (CXCL) 1, colony stimulating factor (CSF)-1, C-C Motif Chemokine Ligand (CCL) 2, CCL3, CCL4, CXCL2, CXCL12, cluster of differentiation 54 (CD54) and interleukin-1 receptor antagonist (IL-1ra) protein expression in media of cardiac fibroblasts (CFB) co-cultured with non-stretched cardiomyocytes (CM) and stretched CM. N=1. (C) Immunofluorescent staining for smooth muscle  $\alpha$ -actin (SMA). (D) Immunofluorescent staining for fibronectin (FN) and (E) quantification of FN staining presented as relative to controls in CFB cultures on 3 and 8kPa gels alone, or in co-culture with non-stretched and stretched CM. One-way ANOVA was used to determine significant effect of culture type. N 3-6.

Supplementary Figure 3. Cell area after static stretch. (A) Micrograph of 2 cells before and after static stretch. Color overlay to indicate cell area. (B) Cell area for 8 cardiac fibroblasts before and after static stretch. Each line represents one cell. (C) Cell area of cardiac fibroblasts on 3 and 8kPa PA gel controls (ctrl) and after 24h static stretch.

Supplementary Figure 4. Transforming growth factor  $\beta$  (TGF $\beta$ ) mRNA (A), TGF $\beta$  activity (B) and fibronectin EDA mRNA (C) and integrin  $\alpha$ v (Itg $\alpha$ v; E) mRNA normalized to GAPDH in control (C) or stretched (S) cardiac fibroblasts on 3 and 8kPa PA gels. (D) Immunostaining micrographs and quantification for fibronectin (FN) on 3 and 8kPa PA gels.

Supplementary Figure 5. UV light exposure of the duration of 3.5min does not cause damage to cardiac fibroblasts. (A) Immunostaining for p53 protein after exposure to UV light in the presence or absence of the photoinitiated cross-linker Irgacure. No primary antibody (No 1<sup>o</sup>AB) was used as negative control and 15min UV exposure was used as positive control. (B) Live-dead stain showing nuclei of live cells in blue and dead cells in green.

Supplementary Figure 6. Matrix stiffening model. (A) Immunofluorescent staining for smooth muscle  $\alpha$ -actin (SMA; green) and phalloidin staining for F-actin (red). mRNA of transforming

growth factor  $\beta$  (TGF $\beta$ ) and fibronectin extradomain A (EDA) in (B) and tenascin C (TNC), secreted protein acidic and rich in cysteine (SPARC), periostin (POSTN), thrombospondin 1 (THBS1) and metalloproteinase (MMP) 2, bone morphogenetic protein 1 (BMP1), tissue inhibitor of metalloproteinase (TIMP) 1 and 2 in (D) normalized to glyceraldehyde 3-phosphate dehydrogenase (GAPDH) mRNA in cardiac fibroblasts on 8kPa gels stiffened to 30kPa. Relative lysyl oxidase (LOX) activity (C) and proliferation (E) of CFB on 8kPa and stiffened gels. Student's *t*-tests were used to determine significant changes. N=4-12.

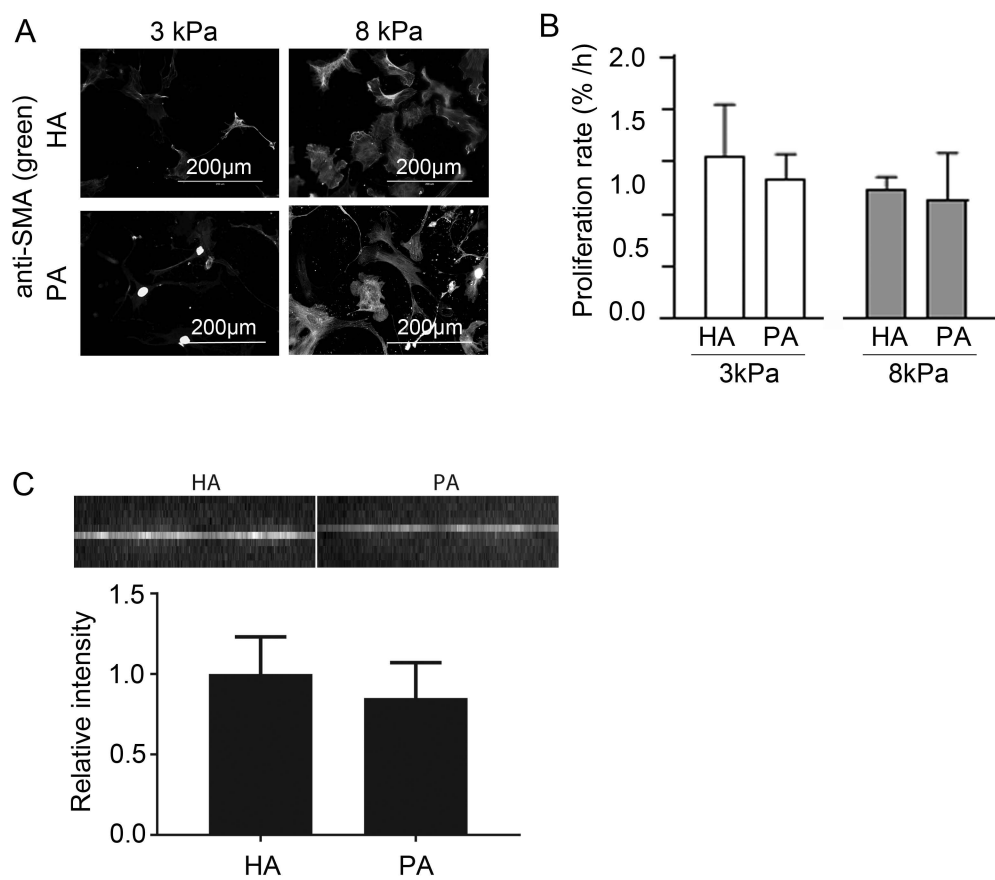

Supplementary Figure 1.

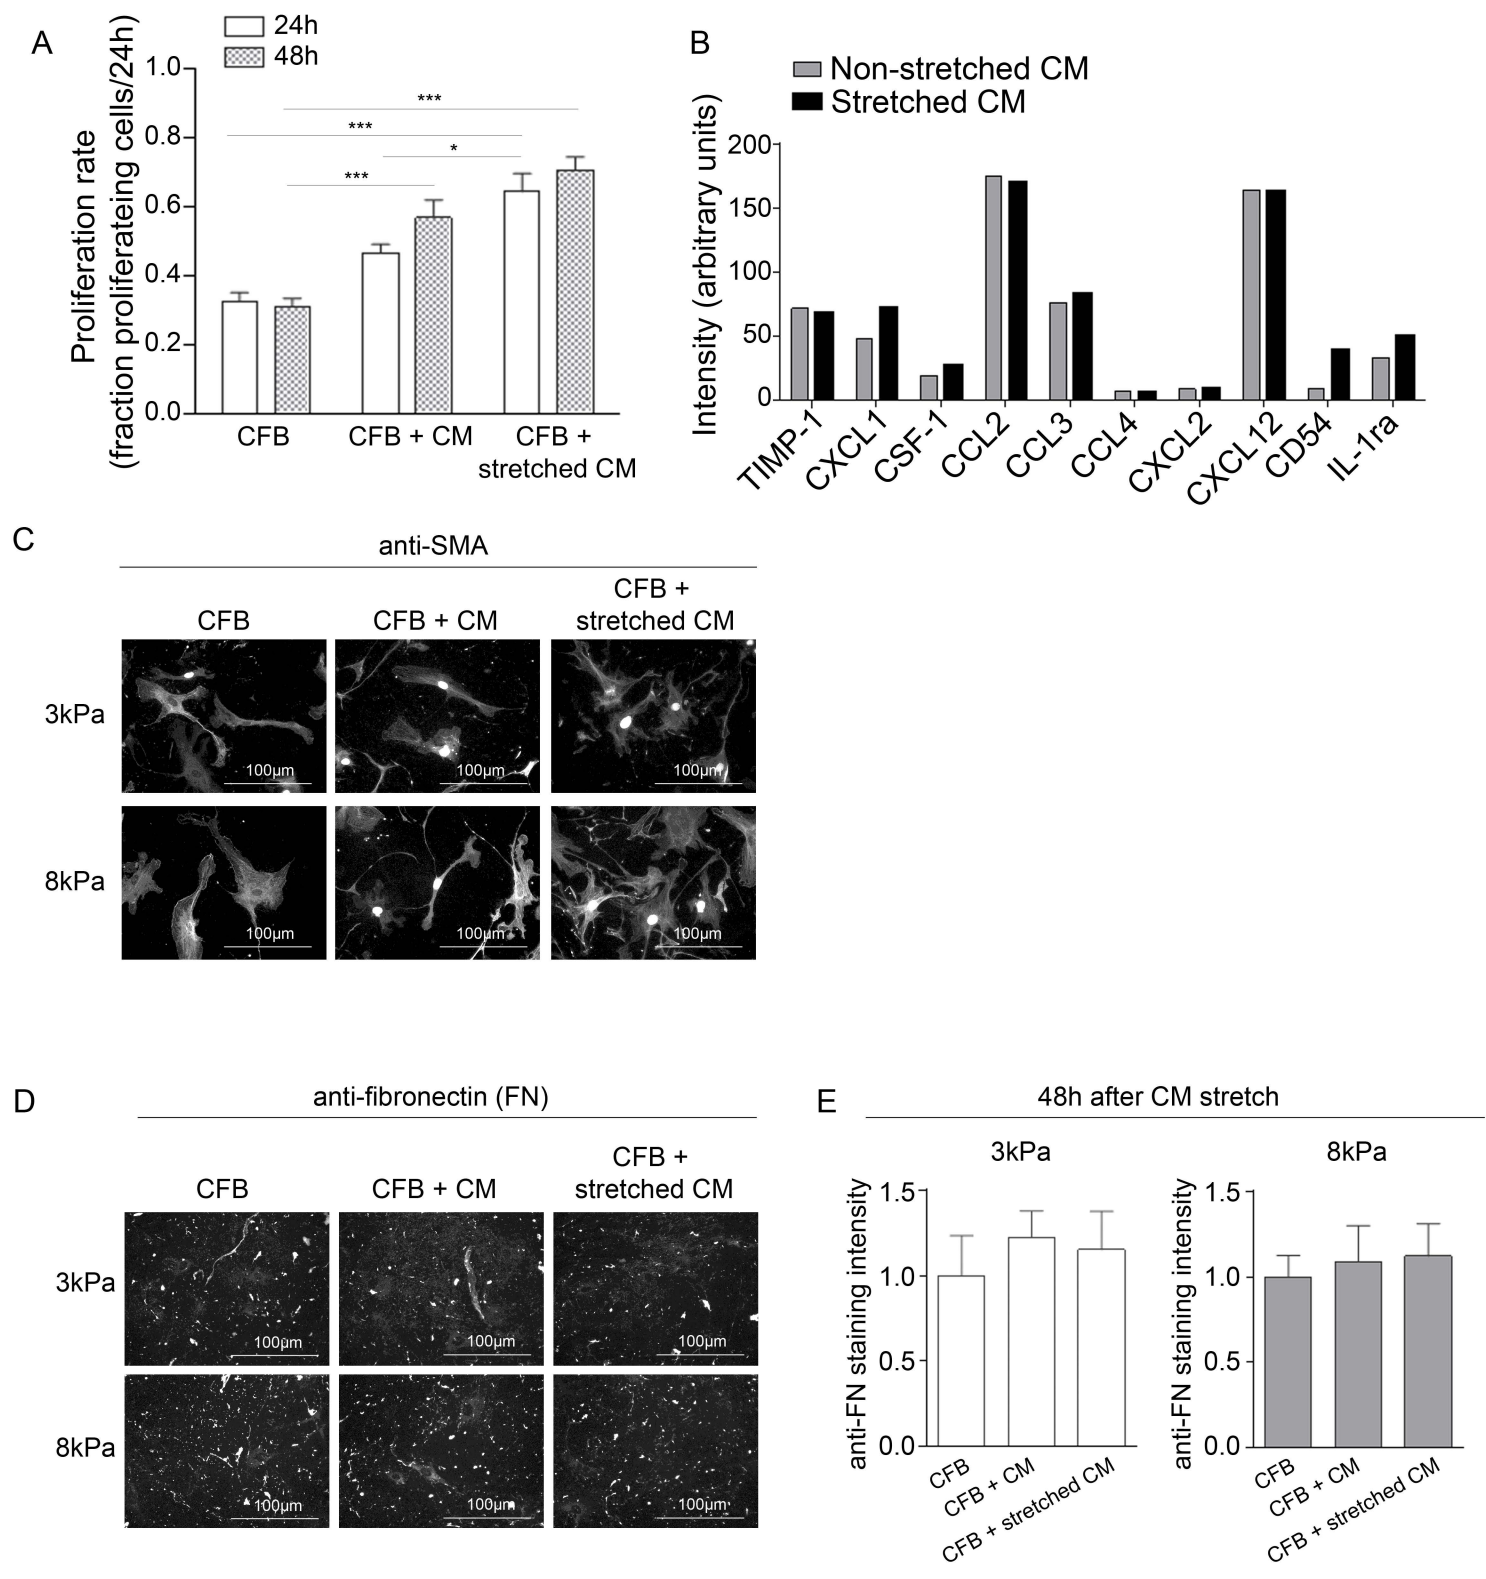

Supplementary Figure 2.

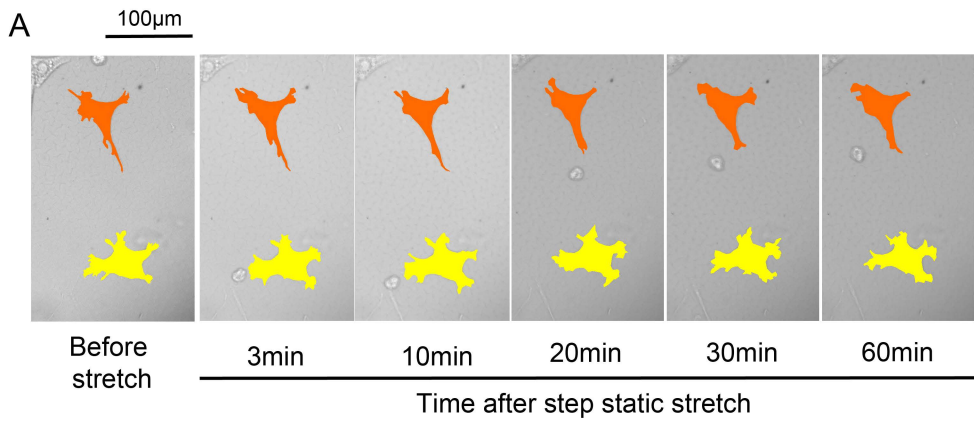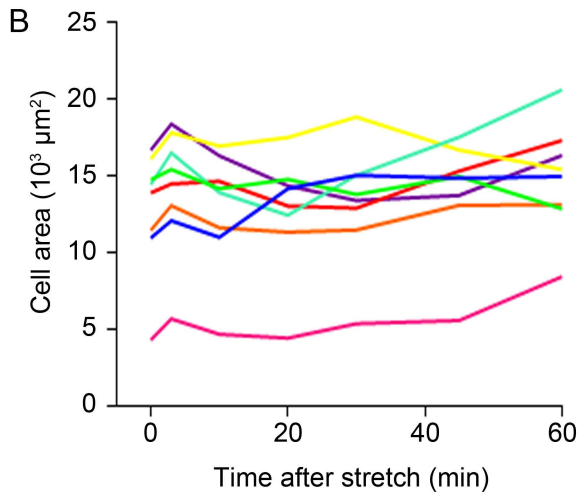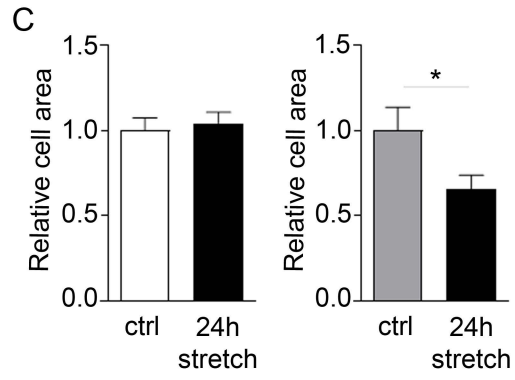

Supplementary Figure 3.

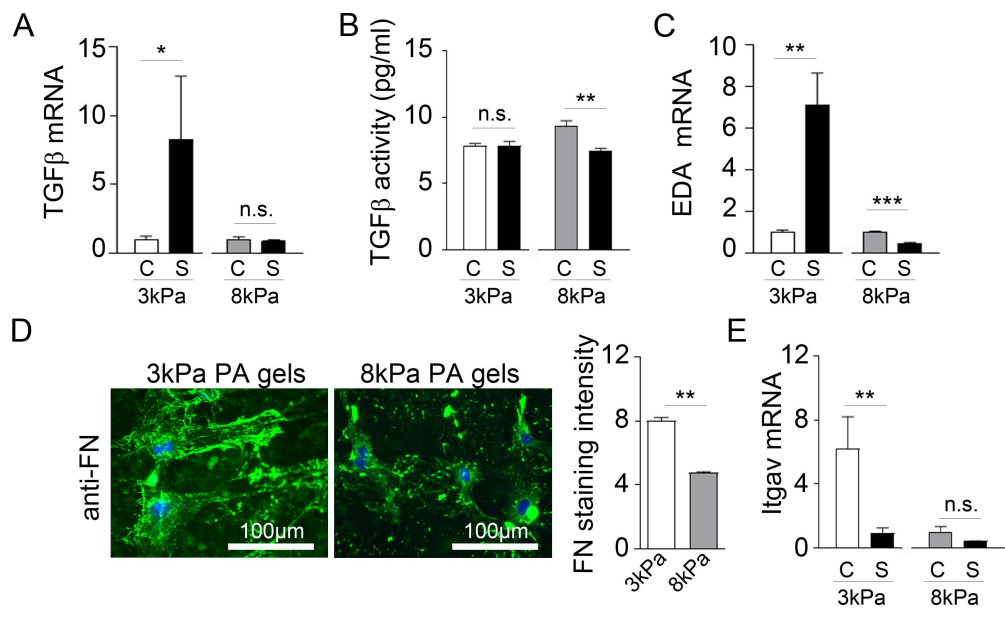

Supplementary Figure 4.

A

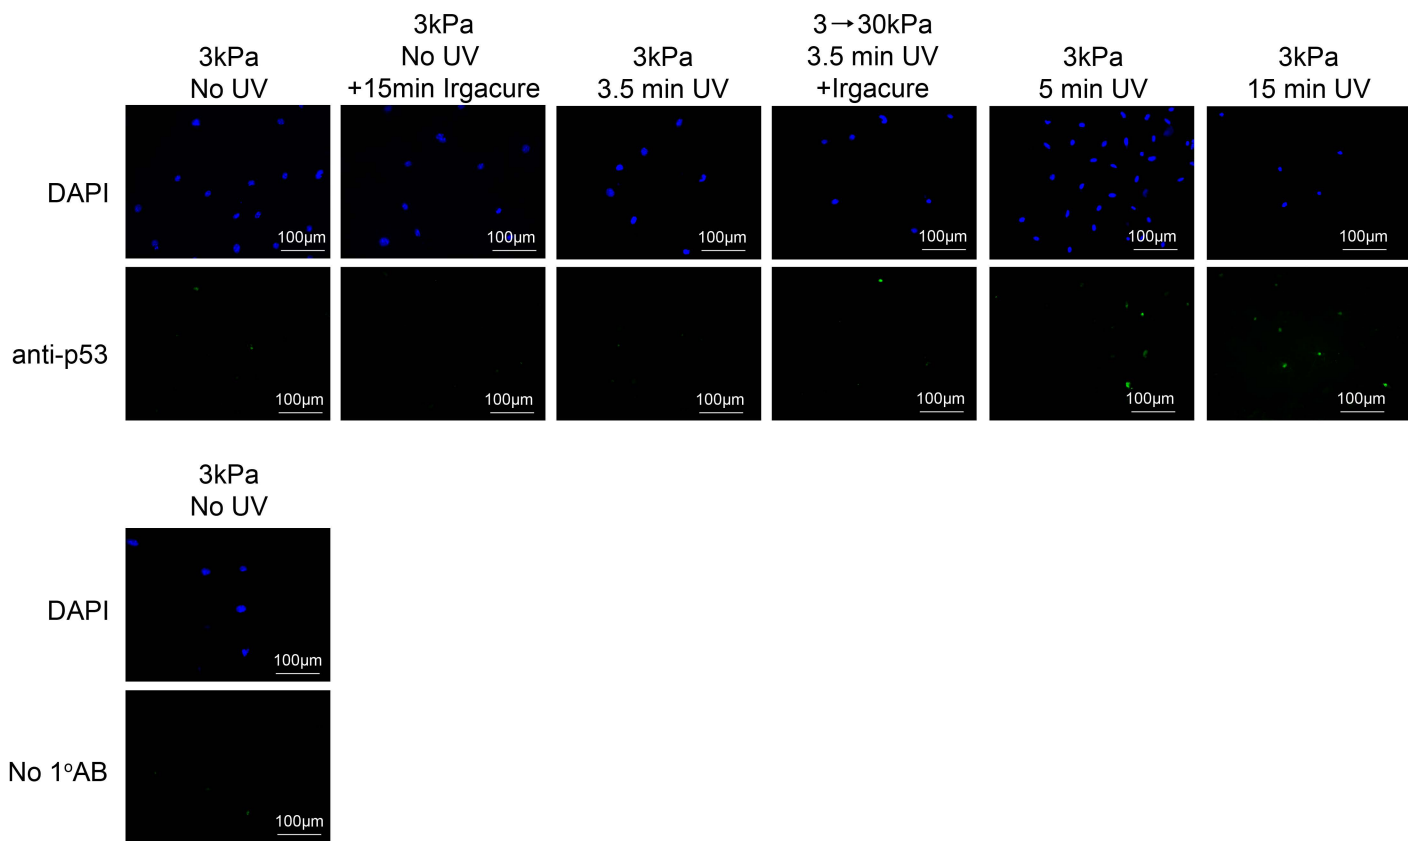

B

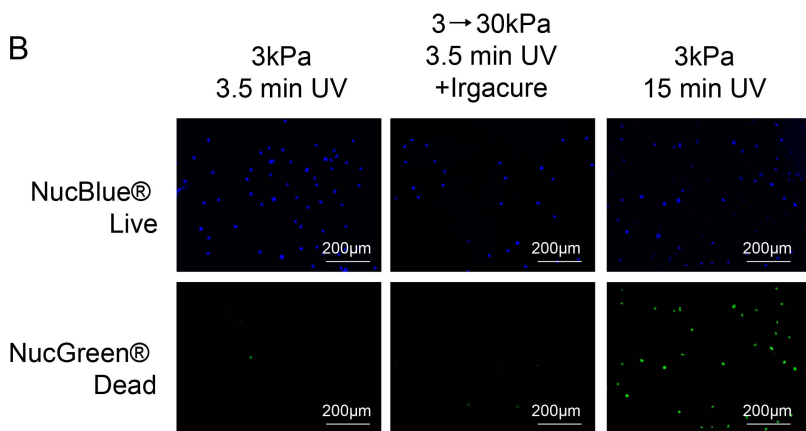



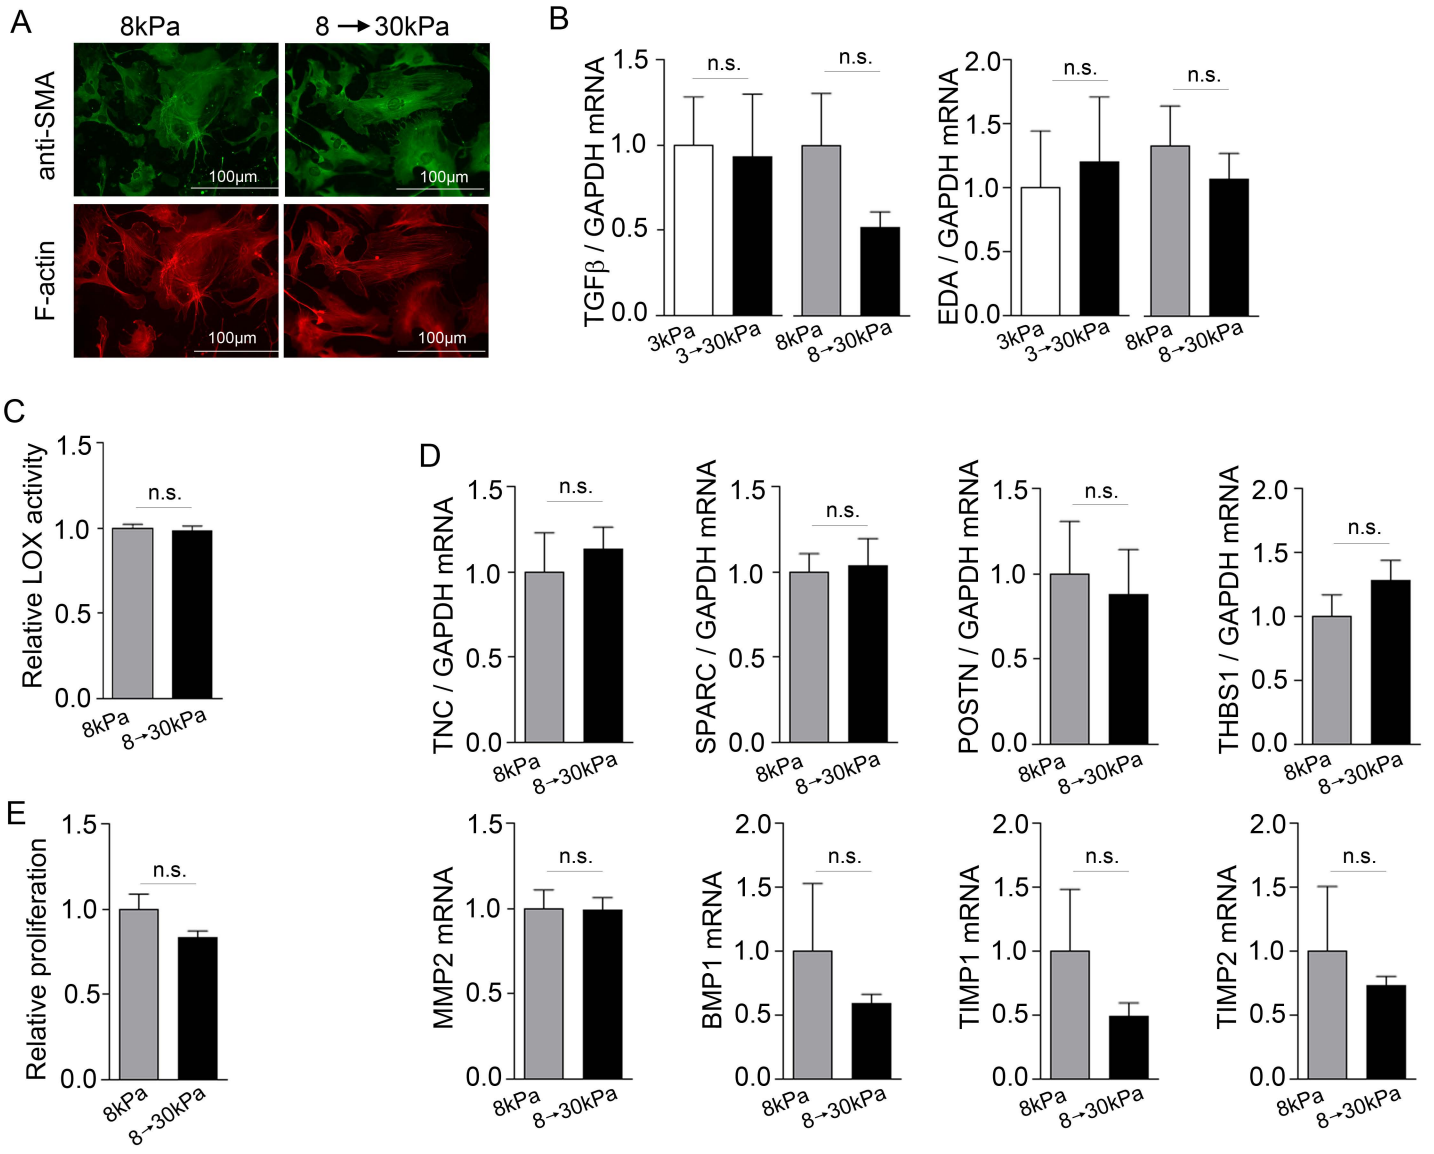

Supplementary Figure 6.

**Supplementary Table 1.** List of primer oligo names, gene names and primer oligo sequences.

| <b>Oligo Name</b> | <b>Gene name</b>                             | <b>Oligo Sequence (5' - 3')</b> |
|-------------------|----------------------------------------------|---------------------------------|
| <b>EDA-F1</b>     | Fibronectin extradomain A                    | TGGGTGTCACCTGACTGAAC            |
| <b>EDA-R1</b>     | Fibronectin extradomain A                    | AGTCCCTACGAGGACCATCC            |
| <b>COL1A1-F1</b>  | Collagen1a1                                  | GCTCCTCTTAGGGGCCACT             |
| <b>COL1A1-R1</b>  | Collagen1a1                                  | CCACGTCTCACCATTGGGG             |
| <b>COL1A2-F1</b>  | Collagen 1a2                                 | GGTGAGCCTGGTCAAACGG             |
| <b>COL1A2-R1</b>  | Collagen 1a2                                 | ACTGTGTCCTTTCACGCCTTT           |
| <b>COL3A1-F1</b>  | Collagen 3a1                                 | CTGTAACATGGAAACTGGGGAAA         |
| <b>COL3A1-R1</b>  | Collagen 3a1                                 | CCATAGCTGAACTGAAAACCACC         |
| <b>OPN-F1</b>     | Osteopontin                                  | AGCAAGAAACTCTTCCAAGCAA          |
| <b>OPN-R1</b>     | Osteopontin                                  | GTGAGATTCGTCAGATTCATCCG         |
| <b>FN1-F1</b>     | Fibronectin                                  | ATGTGGACCCCTCCTGATAGT           |
| <b>FN1-R1</b>     | Fibronectin                                  | GCCCAGTGATTTACAGCAAAGG          |
| <b>POSTN-F1</b>   | Periostin                                    | CACGGCATGGTTATTCCCTTCA          |
| <b>POSTN-R1</b>   | Periostin                                    | TCAGGACACGGTCAATGACAT           |
| <b>THBS1-F1</b>   | Thrombospondin 1                             | GTGAGGTTTGTCTTTGGAACCA          |
| <b>THBS1-R1</b>   | Thrombospondin 1                             | GTTGTTGTCAAGGGTAAGAAGGA         |
| <b>TNC-F1</b>     | Tenascin C                                   | GCATCCGTACCAAAACCATCA           |
| <b>TNC-R1</b>     | Tenascin C                                   | AACCCGTAGGGATTAGTGTCG           |
| <b>SPARC-F1</b>   | Secreted protein acidic and rich in cysteine | GTGGAAATGGGAGAATTTGAGGA         |
| <b>SPARC-R1</b>   | Secreted protein acidic and rich in cysteine | CTCACACACCTTGCCATGTTT           |
| <b>LOX-F1</b>     | Lysyl oxidase                                | TCTTCTGCTGCGTGACAACC            |
| <b>LOX-R1</b>     | Lysyl oxidase                                | GAGAAACCAGCTTGGAACCAG           |
| <b>MMP2-F1</b>    | Matrix metalloproteinase 2                   | CAAGTTCCCCGCGCATGTC             |
| <b>MMP2-R1</b>    | Matrix metalloproteinase 2                   | TTCTGGTCAAGGTCACCTGTC           |
| <b>MMP9-F1</b>    | Matrix metalloproteinase 9                   | CTGGACAGCCAGACACTAAAG           |
| <b>MMP9-R1</b>    | Matrix metalloproteinase 9                   | CTCGCGCAAGTCTTCAGAG             |
| <b>MMP13-F1</b>   | Matrix metalloproteinase 13                  | CTTCTTCTTGTTGAGCTGGACTC         |
| <b>MMP13-R1</b>   | Matrix metalloproteinase 13                  | CTGTGGAGGTCCTGTAGACT            |
| <b>TGFb-F1</b>    | Transforming growth factor $\beta$           | CTCCCGTGGCTTCTAGTGC             |
| <b>TGFb-R1</b>    | Transforming growth factor $\beta$           | GCCTTAGTTTGGACAGGATCTG          |
| <b>CXCL1-F1</b>   | Chemokine (C-X-C motif) ligand 1             | CTGGGATTCACCTCAAGAACATC         |
| <b>CXCL1-R1</b>   | Chemokine (C-X-C motif) ligand 1             | CAGGGTCAAGGCAAGCCTC             |
| <b>CD54-F1</b>    | Cluster of differentiation 54                | GTGATGCTCAGGTATCCATCCA          |
| <b>CD54-R1</b>    | Cluster of differentiation 54                | CACAGTTCTCAAAGCACAGCG           |
| <b>IL-1ra-F1</b>  | Interleukin-1 receptor antagonist            | GCTCATTGCTGGGTACTIONTACAA       |
| <b>IL-1ra-R1</b>  | Interleukin-1 receptor antagonist            | CCAGACTTGGCACAAGACAGG           |
| <b>CSF1-F1</b>    | Colony stimulating factor 1                  | ATGAGCAGGAGTATTGCCAAGG          |
| <b>CSF1-R1</b>    | Colony stimulating factor 1                  | TCCATCCCAATCATGTGGCTA           |

|                 |                                          |                          |
|-----------------|------------------------------------------|--------------------------|
| <b>SMA-F1</b>   | Smooth muscle $\alpha$ -actin            | GTCCCAGACATCAGGGAGTAA    |
| <b>SMA-R1</b>   | Smooth muscle $\alpha$ -actin            | TCGGATACTTCAGCGTCAGGA    |
| <b>PDGFb-F1</b> | Platelet-derived growth factor B         | CATCCGCTCCTTTGATGATCTT   |
| <b>PDGFb-F2</b> | Platelet-derived growth factor B         | GTGCTCGGGTCATGTTCAAGT    |
| <b>TIMP1-F1</b> | Tissue inhibitor of metalloproteinase 1  | GCAACTCGGACCTGGTCATAA    |
| <b>TIMP1-R1</b> | Tissue inhibitor of metalloproteinase 1  | CGGCCCGTGATGAGAACT       |
| <b>TIMP2-F1</b> | Tissue inhibitor of metalloproteinase 2  | TCAGAGCCAAAGCAGTGAGC     |
| <b>TIMP2-R1</b> | Tissue inhibitor of metalloproteinase 2  | GCCGTGTAGATAAACTCGATGTC  |
| <b>GAPDH-F1</b> | Glyceraldehyde 3-phosphate dehydrogenase | AGGTCGGTGTGAACGGATTTG    |
| <b>GAPDH-R1</b> | Glyceraldehyde 3-phosphate dehydrogenase | TGTAGACCATGTAGTTGAGGTCA  |
| <b>FGF2-F1</b>  | Fibroblast growth factor 2               | GCGACCCACACGTCAAATA      |
| <b>FGF2-r1</b>  | Fibroblast growth factor 2               | TCCCTTGATAGACACAACCTCCTC |
| <b>BMP1-F1</b>  | Bone morphogenetic protein 1             | TTGTACGCGAGAACATACAGC    |
| <b>BMP1-R1</b>  | Bone morphogenetic protein 1             | CTGAGTCGGGTCCTTTGGC      |
